# Supplementary material for: Constant chemical potential cycles for capacitive deionization
Source: Royal Society of Chemistry journal article supplement (doi:10.1039/c9cp05032a), 2019-01-01
Supplement: c9cp05032a1.pdf [file c9cp05032a1.pdf]

## Supporting Information for: Constant Chemical Potential Cycles for Capacitive Deionization

Daniel Moreno and Marta C. Hatzell

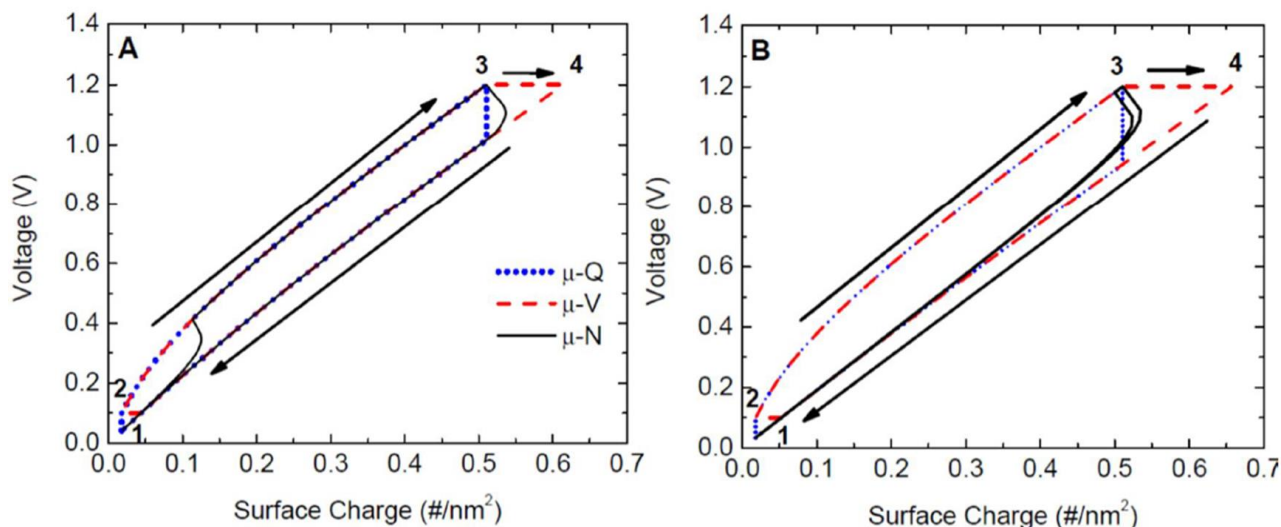

Figure SI1. Charge-voltage diagrams for (A) 20 mM feed, (B) 100 mM feed.

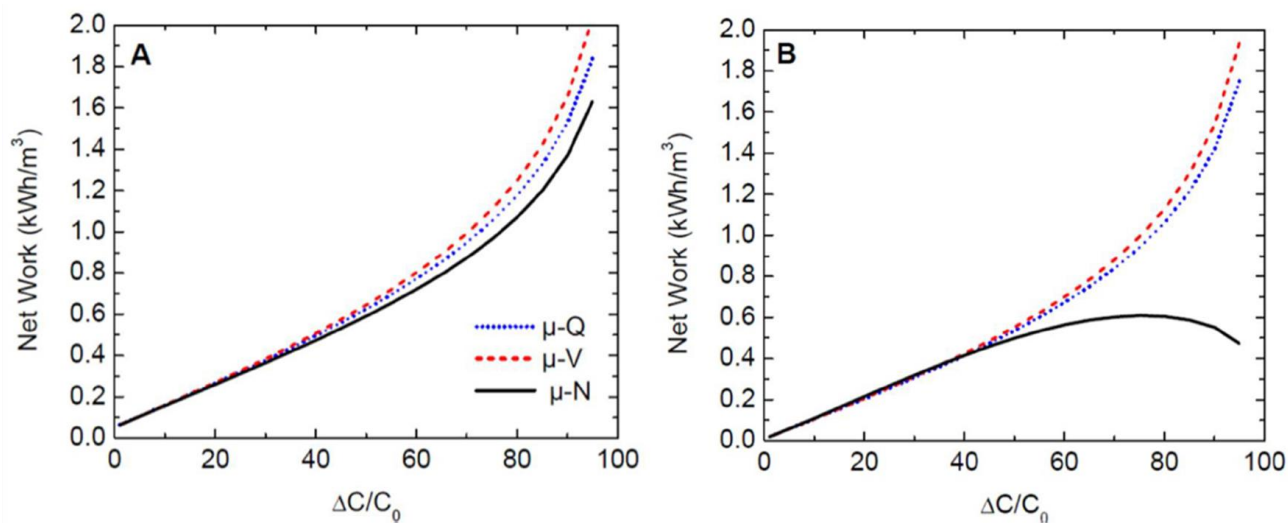

Figure SI2. Cycle energy consumption as a function of percentage of desalination, (A) 20 mM feed, (B) 100 mM feed.

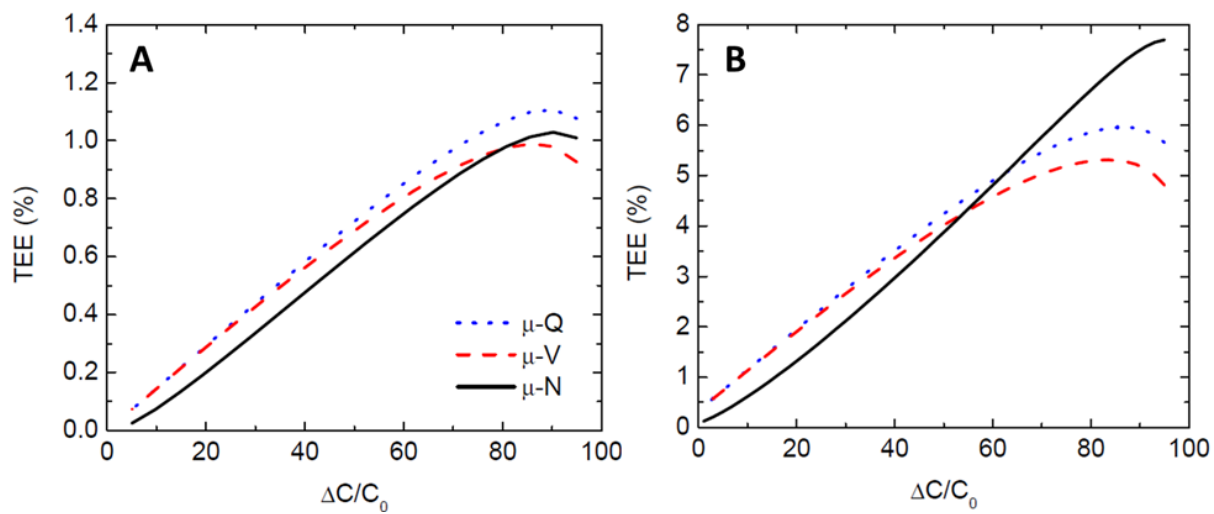

Figure SI3. Modified Donnan (mD) model thermodynamic energy efficiency (TEE) as a function of desalination percent. (A) 20 mM, (B) 100 mM.
